# Supplementary material
Source: PubMed Central journal article supplement (PMC6280801)
Supplement: EMBR-19-e46363-s001.pdf [file EMBR-19-e46363-s001.pdf]

## Expanded View Figures

**Figure EV1. Effect of valinomycin treatment on the levels of NDP52 and mitochondrial proteins.**

- A HeLa-GFP-Parkin cells incubated with valinomycin for 0–24 h. Cell lysates were subjected to Western blotting using the indicated antibodies.
- B HeLa-GFP-Parkin cells incubated with valinomycin for 3 h in the presence or absence of 100 nM bafilomycin A<sub>1</sub> or epoxomicin. Cell lysates were subjected to Western blotting using the indicated antibodies.
- C HeLa-GFP-Parkin cells expressing mCherry-NDP52 were incubated with valinomycin. Cells were immunostained with anti-Tom20 antibody. Colocalization of GFP-Parkin, NDP52, and Tom20 was determined using Line Scan. Fluorescence intensities of each channel were measured along the white arrow. Scale bars, 10 μm.
- D Mitophagy flux assay in FIP200 KD cells. Cells transfected with siFIP200 oligo were incubated with valinomycin for 6 h in the presence or absence bafilomycin A<sub>1</sub>. Results are a summary of three independent experiments. Values are the means ± SEM. \*\**P* < 0.01 compared with scrambled oligo-treated cells, determined with one-way ANOVA followed by the Student's *t*-test.
- E mCherry-NDP52 was expressed in HeLa-GFP-Parkin cells and immunostained with anti-Lamp2 antibody. Scale bars, 10 μm.

Source data are available online for this figure.

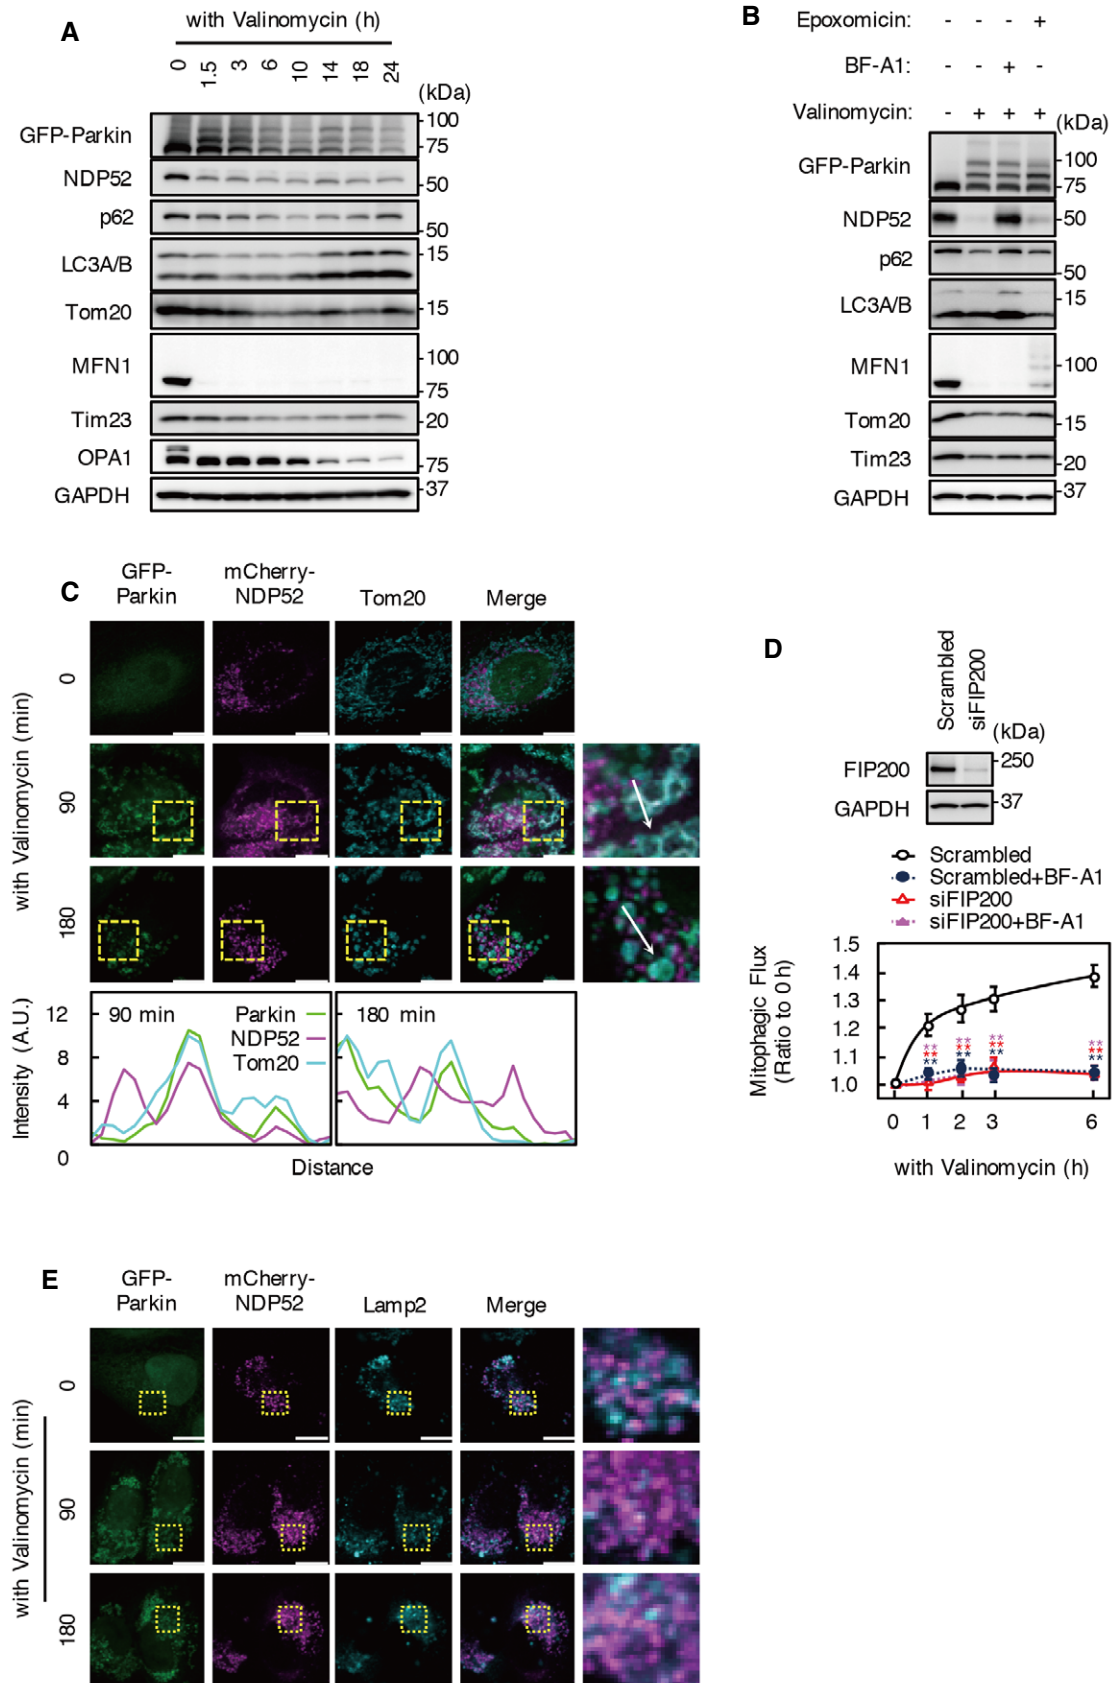

Figure EV1.

**Figure EV2. Ubiquitin-binding-deficient mutants of NDP52 fail to localize at damaged mitochondria.**

- A Schematic structures of NDP52 truncated mutants used in this study.
- B HeLa-GFP-Parkin cells expressing mCherry-NDP52  $\Delta$ SKICH,  $\Delta$ CLIR, or  $\Delta$ LIM-L were immunostained with anti-Tom20 antibody. Scale bars, 10  $\mu$ m. Colocalization of GFP-Parkin, mCherry-NDP52 mutant, and Tom20 was determined using Line Scan. Fluorescence intensities of each channel were measured along the white arrow.
- C HeLa-GFP-Parkin cells expressing mCherry-NDP52 or  $\Delta$ CLIR were incubated with valinomycin and bafilomycin A<sub>1</sub> for 3 h. Cell lysates were subjected to immunoprecipitation using an anti-RFP antibody. Immunoprecipitates were analyzed by Western blotting.
- D HeLa-GFP-Parkin cells expressing mCherry-NDP52 mutants were incubated with valinomycin and bafilomycin A<sub>1</sub> for 3 h. Cell lysates were subjected to immunoprecipitation using an anti-RFP antibody. Immunoprecipitates were analyzed by Western blotting.
- E HeLa-GFP-Parkin cells expressing mCherry-NDP52 $\Delta$ ZF2 or D439R/C443K were incubated with valinomycin for 2 h. Immunostaining was performed with anti-Tom20 antibody. Scale bar, 10  $\mu$ m. Colocalization of GFP-Parkin, mCherry-NDP52 mutant, and Tom20 was assessed using Line Scan.
- F Mitophagic flux in NDP52 KD cells transfected with siRNA-resistant NDP52 or NDP52 mutants. Cells were incubated with valinomycin for 3 h. Results are a summary of three independent experiments. Values are the means  $\pm$  SEM. \*\* $P < 0.01$  vs. scrambled oligo-transfected cells; † $P < 0.05$ , †† $P < 0.01$  vs. empty vector-transfected cells, determined with one-way ANOVA followed by the Tukey–Kramer *post hoc* test.
- G mCherry-NDP52 was expressed in TBK1 KD cells. Cells were incubated with 1  $\mu$ M valinomycin for 2 h and immunostained with anti-Tom20 antibody. Scale bars, 10  $\mu$ m. Colocalization of GFP-Parkin, mCherry-NDP52 mutant, and Tom20 was determined using Line Scan.

Source data are available online for this figure.

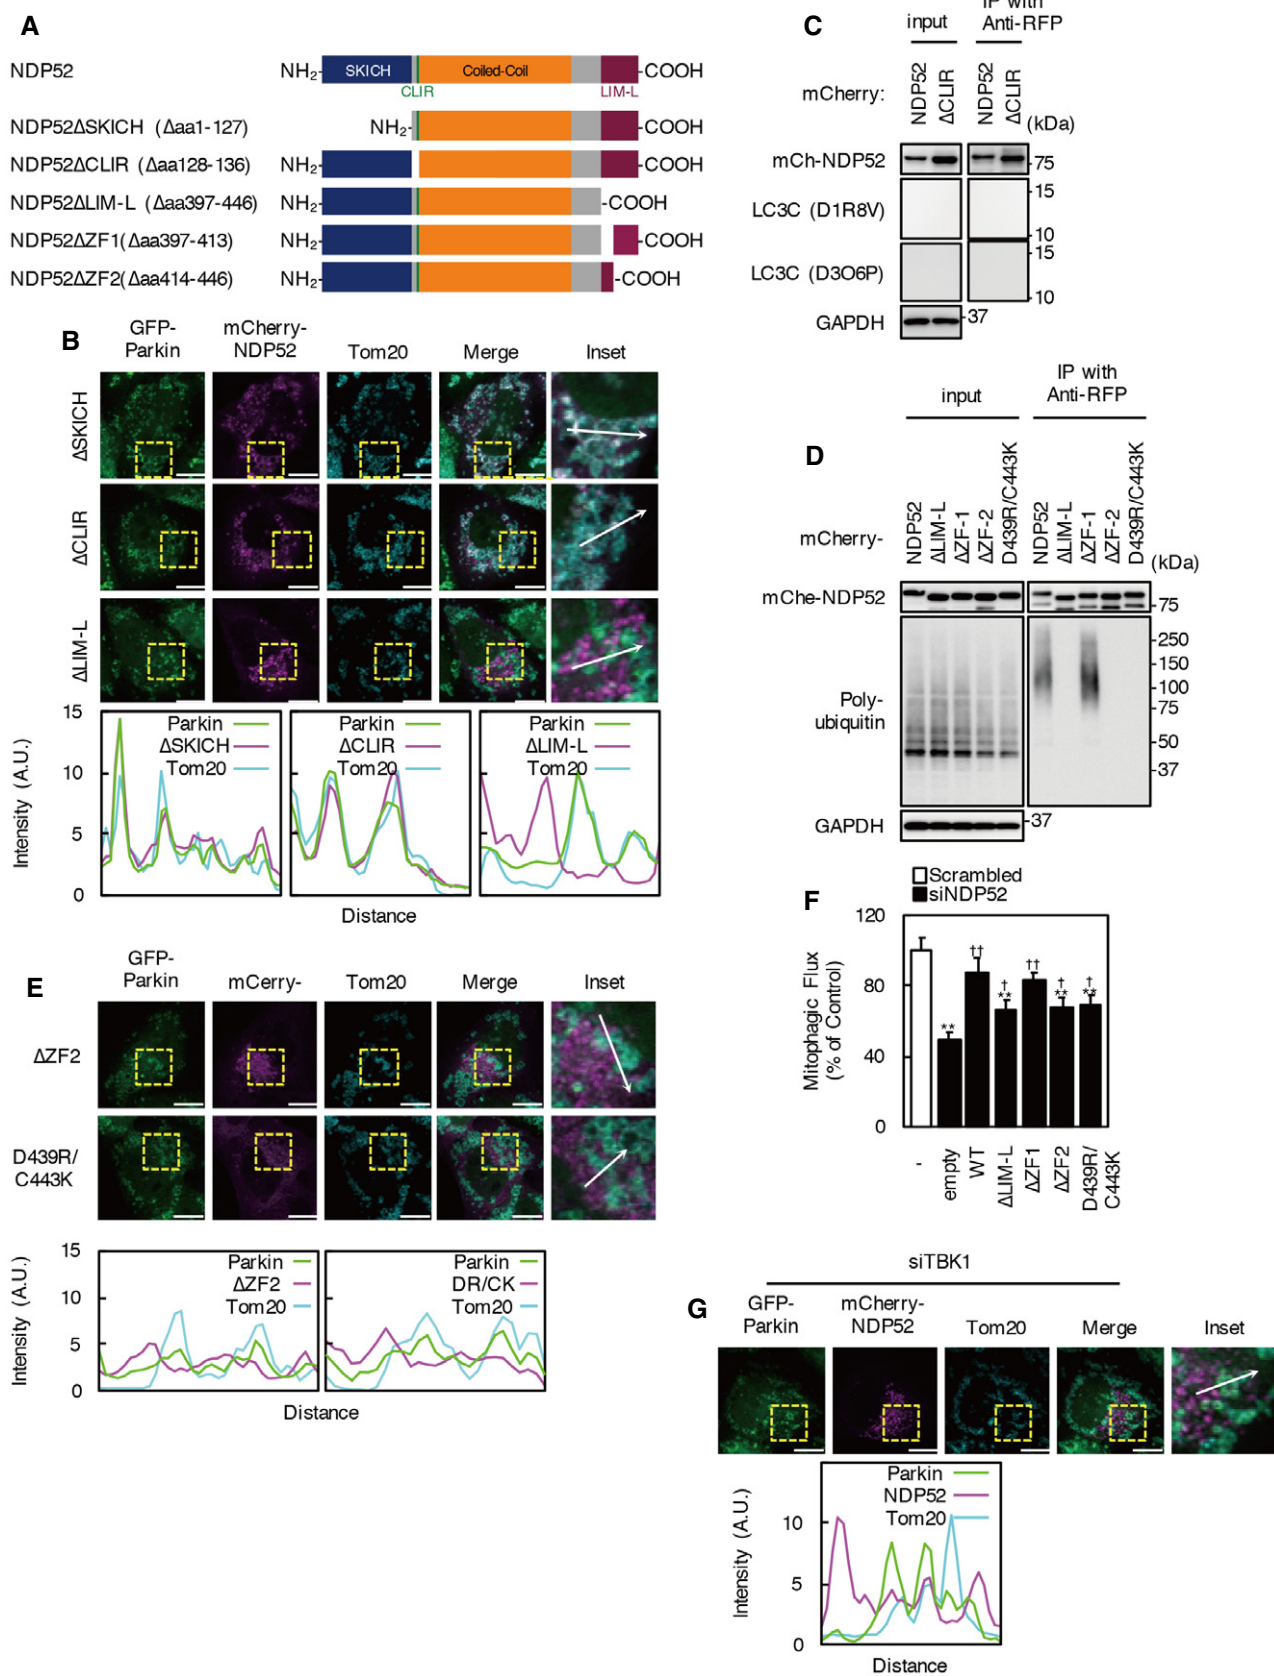

Figure EV2.

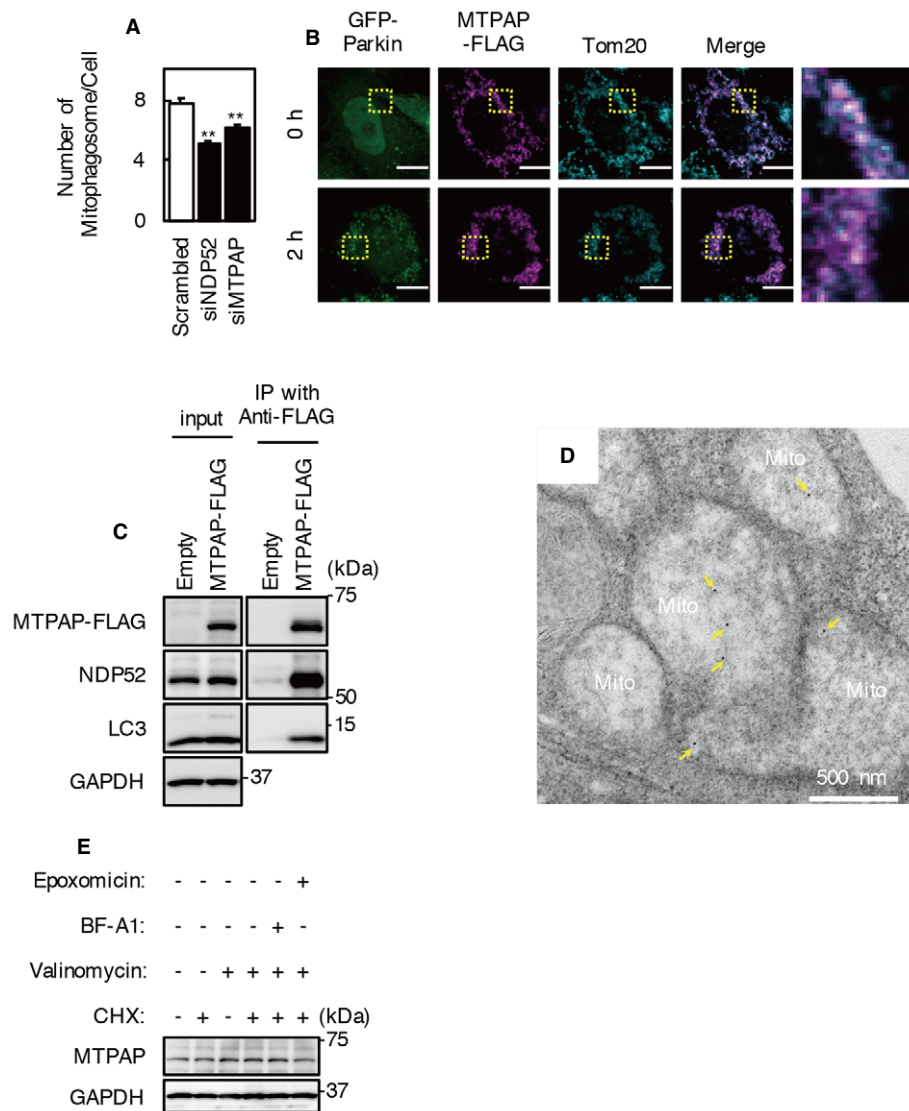

**Figure EV3. Intra-mitochondrial localization of MTPAP does not change following valinomycin treatment.**

**A** The number of mitophagosomes per cell was counted in NDP52 KD, MTPAP KD, and control cells. Results are a summary of three independent experiments. Values are the means  $\pm$  SEM. \*\* $P < 0.01$  vs. control, determined with one-way ANOVA followed by the Tukey–Kramer *post hoc* test.

**B** MTPAP-FLAG was expressed in HeLa-GFP-Parkin cells. Cells were incubated with valinomycin for 0 or 2 h. Immunostaining was performed with anti-FLAG and anti-Tom20 antibodies. Scale bars, 10  $\mu$ m.

**C** HeLa-GFP-Parkin cells transfected with pMTPAP-FLAG or empty vector were incubated with valinomycin and bafilomycin A<sub>1</sub> for 2 h. Cell lysates were immunoprecipitated with anti-FLAG magnetic beads.

**D** HeLa-GFP-Parkin cells expressing MTPAP-FLAG were incubated with 1  $\mu$ M valinomycin for 2 h and then subjected to immunoelectron microscopy analysis using an anti-FLAG antibody. Arrow, immunogold-labeled FLAG-MTPAP. Scale bar, 500 nm.

**E** HeLa-GFP-Parkin cells were incubated with or without valinomycin and cycloheximide for 2 h, and Western blotting was performed.

Source data are available online for this figure.

**Figure EV4. Knockdown of PHB2, Rab35, and TBK1 does not influence the interaction between NDP52 and MTPAP.**

- A Mitophagic flux in cells transfected with siNDP52, siPHB2, and a combination of siRNAs. Cells were incubated with valinomycin for 3 h. Results are a summary of three independent experiments. Values are the means  $\pm$  SEM. \* $P < 0.05$ , \*\* $P < 0.01$  vs. scrambled oligo-transfected cells; † $P < 0.05$  vs. siNDP52-transfected cells; § $P < 0.05$  vs. siPHB2-transfected cells, determined with one-way ANOVA followed by the Tukey–Kramer *post hoc* test.
- B Images of PHB2 KD cells expressing mCherry-NDP52 under valinomycin treatment. The images are from the upper movie of Movie EV8. Cyan, GFP-Parkin; magenta, mCherry-NDP52. Scale bars, 10  $\mu$ m.
- C mCherry-NDP52 was expressed in MTPAP KD, PHB2 KD, and control cells. Lysates from cells treated with valinomycin and bafilomycin A<sub>1</sub> for 2 h were subjected to immunoprecipitation using anti-RFP beads. Immunoprecipitates were analyzed by Western blotting. The position of MTPAP is indicated by arrowheads.
- D Mitophagic flux in cells transfected with combinations of siNDP52 and siRab35. Cells were incubated with valinomycin for 2 h. Results are a summary of three independent experiments. Values are the means  $\pm$  SEM. \* $P < 0.05$  vs. scrambled oligo-transfected cells; NS, not significant.
- E Images of Rab35 KD cells expressing mCherry-NDP52 under valinomycin treatment. The images are from the lower movie of Movie EV8. Cyan, GFP-Parkin; magenta, mCherry-NDP52. Scale bars, 10  $\mu$ m.
- F mCherry-NDP52 was expressed in MTPAP KD, Rab35 KD, and control cells. Lysates from cells treated with 1  $\mu$ M valinomycin and 100 nM bafilomycin A<sub>1</sub> for 2 h were subjected to immunoprecipitation using anti-RFP beads. Immunoprecipitates were analyzed by Western blotting. The position of MTPAP is indicated by arrowheads.
- G mCherry-NDP52 was expressed in MTPAP KD, TBK1 KD, and control cells. Lysates from cells treated with 1  $\mu$ M valinomycin and 100 nM bafilomycin A<sub>1</sub> for 2 h were subjected to immunoprecipitation using anti-RFP beads. Immunoprecipitates were analyzed by Western blotting. The position of MTPAP is indicated by arrowheads.

Source data are available online for this figure.

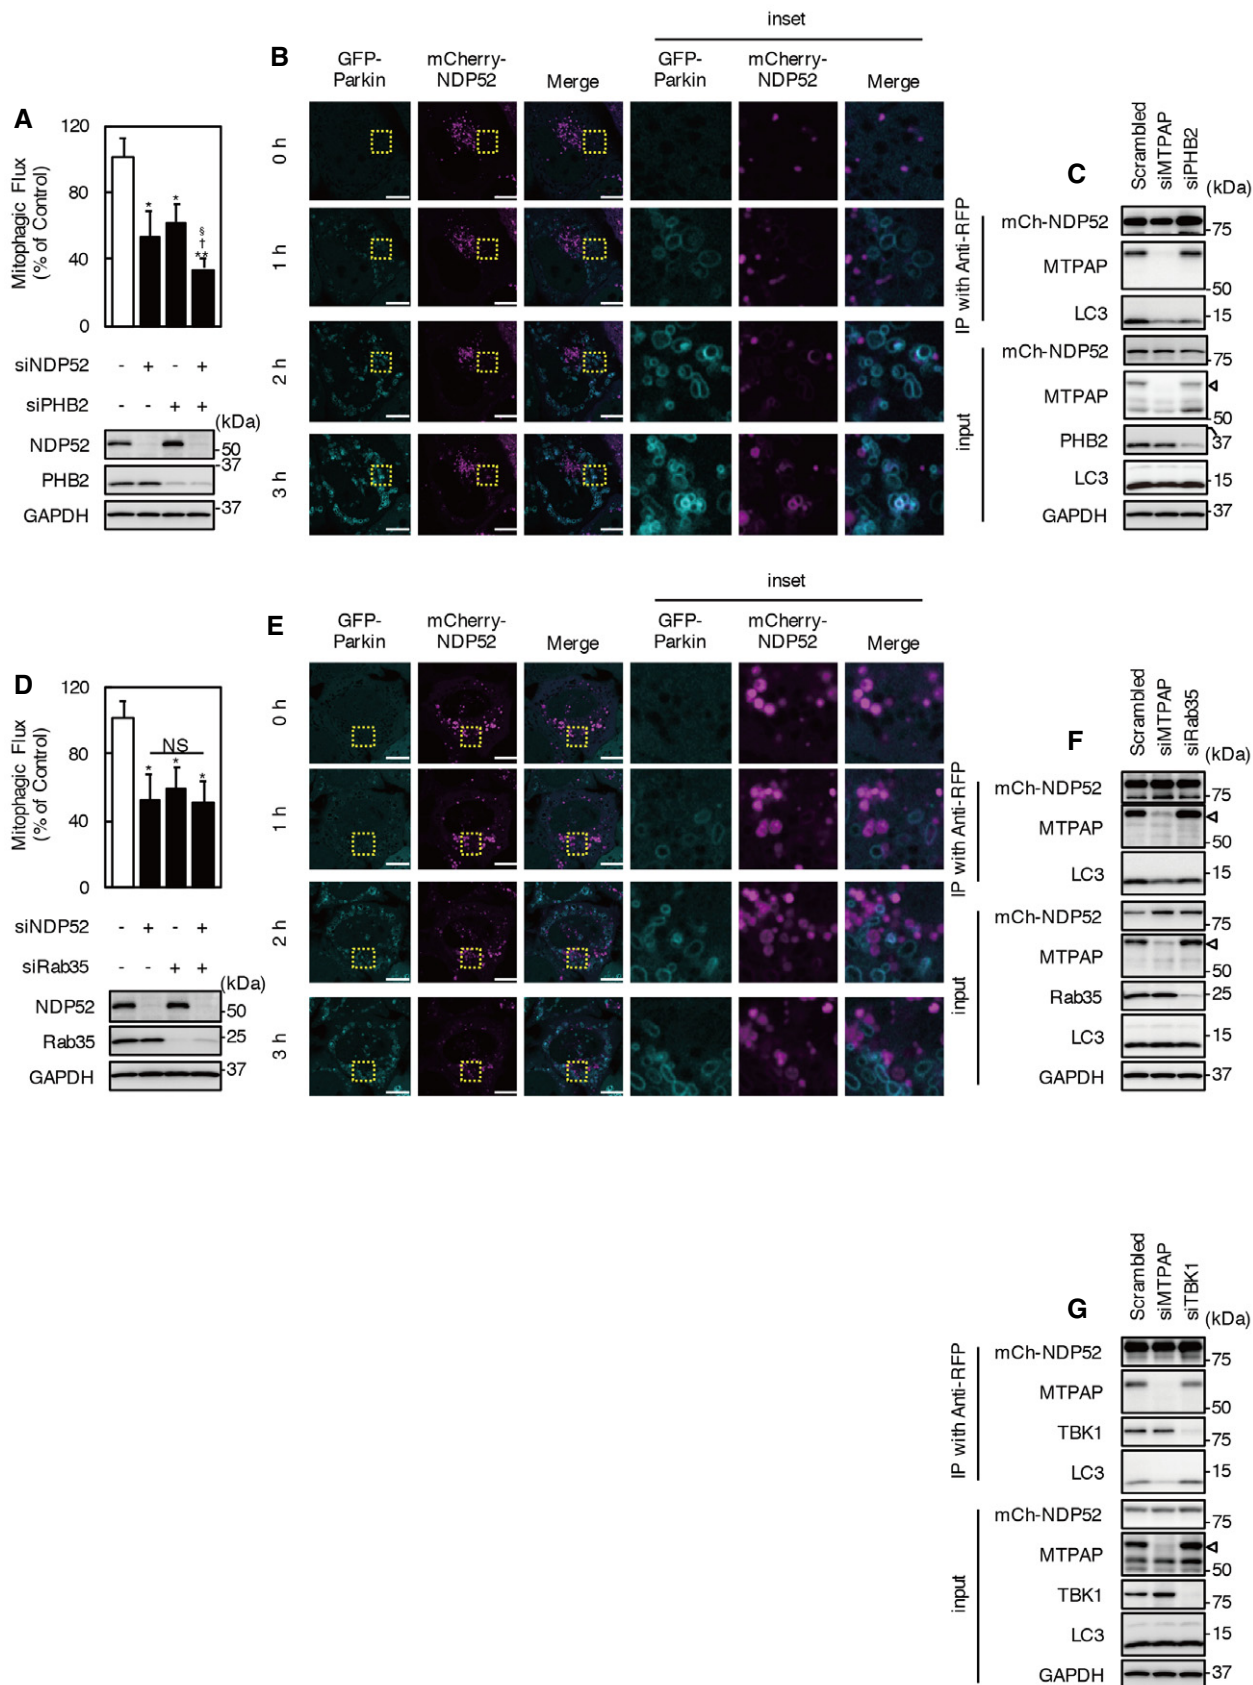

Figure EV4.

**A**

| MOTIF | START | END | LIR sequence | PSSM score   |
|-------|-------|-----|--------------|--------------|
| xLIR  | 245   | 250 | DMFLDL       | 13 (7.9e-02) |
| WxxL  | 96    | 101 | SQFGPI       | 5 (1.0e+00)  |
| WxxL  | 111   | 116 | GLYAVV       | 4 (1.4e+00)  |
| WxxL  | 146   | 151 | SRFFNL       | 3 (1.9e+00)  |
| WxxL  | 175   | 180 | QLFELL       | 6 (7.4e-01)  |
| WxxL  | 235   | 240 | NTFGKL       | 5 (1.9e+00)  |
| WxxL  | 341   | 346 | YIYGAL       | 1 (3.6e+00)  |
| WxxL  | 496   | 501 | QKFVDL       | 8 (3.9e-01)  |
| WxxL  | 523   | 528 | RPWGLV       | 10 (2.0e-01) |

**B**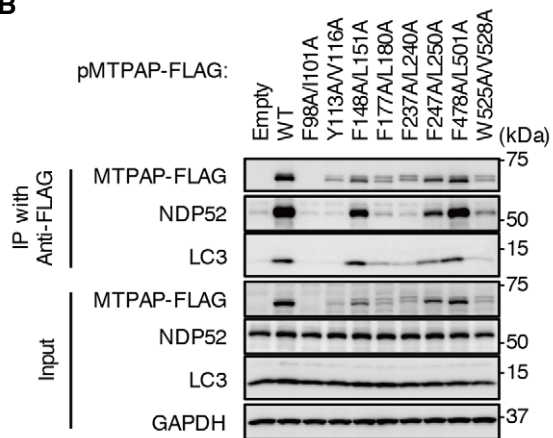**Figure EV5. xLIR motif and WXXL motifs in human MTPAP.**

- A One xLIR motif and nine WXXL motifs of human MTPAP were identified by the iLIR online server.
- B HeLa-GFP-Parkin cells expressing xLIR mutant and WXXL mutants of MTPAP-FLAG incubated with valinomycin and bafilomycin A1 for 3 h. Cell lysates were subjected to immunoprecipitation with anti-FLAG magnetic beads. Immunoprecipitates were analyzed by Western blotting.
