# Supplementary material
Source: PubMed Central journal article supplement (PMC6280801)

GFP-Parkin

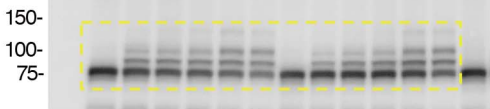

NDP52

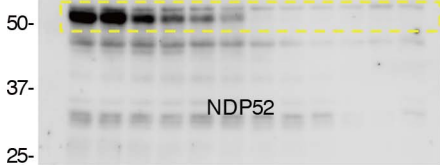

p62

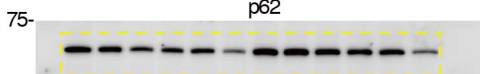

LC3A/B

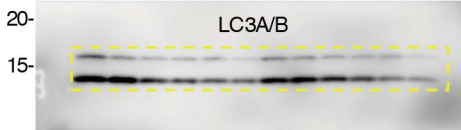

MFN1

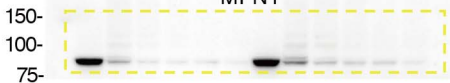

Tom20

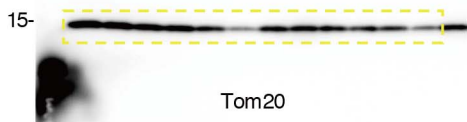

Tim23

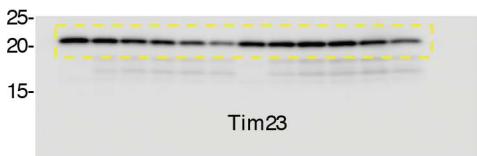

OPA1

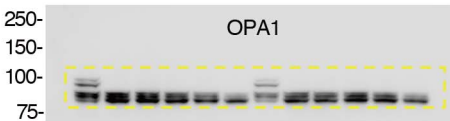

GAPDH

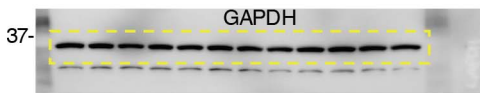

Source data of Fig. 1B

Supplement: EMBR-19-e46363-s012.pdf [file EMBR-19-e46363-s012.pdf]

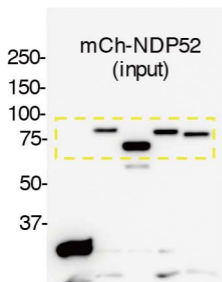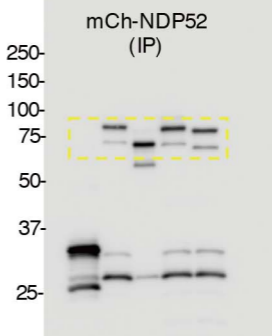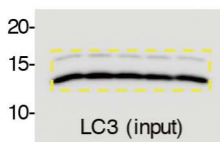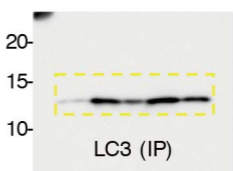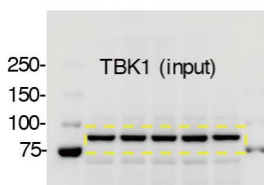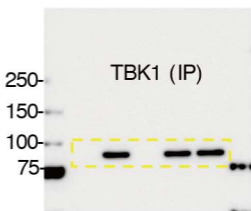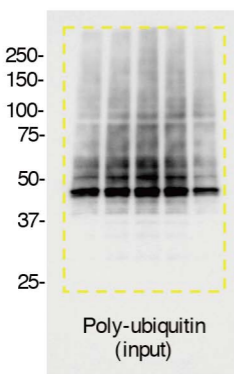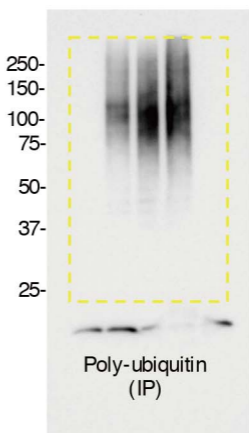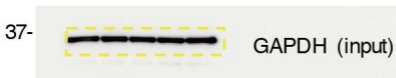

Supplement: EMBR-19-e46363-s013.pdf [file EMBR-19-e46363-s013.pdf]

Fig. 3A

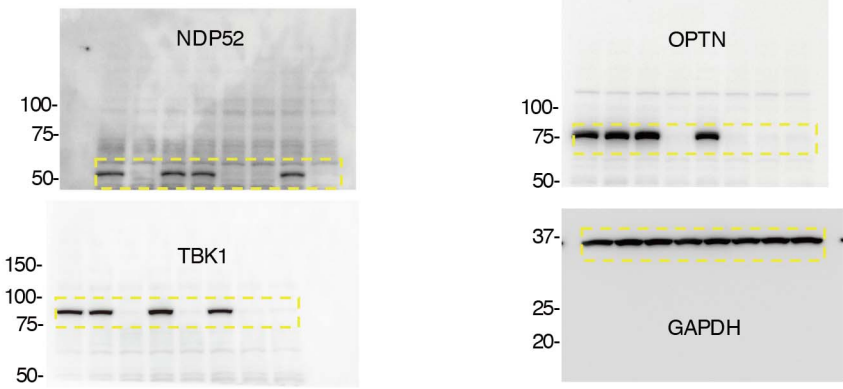

Fig. 3D

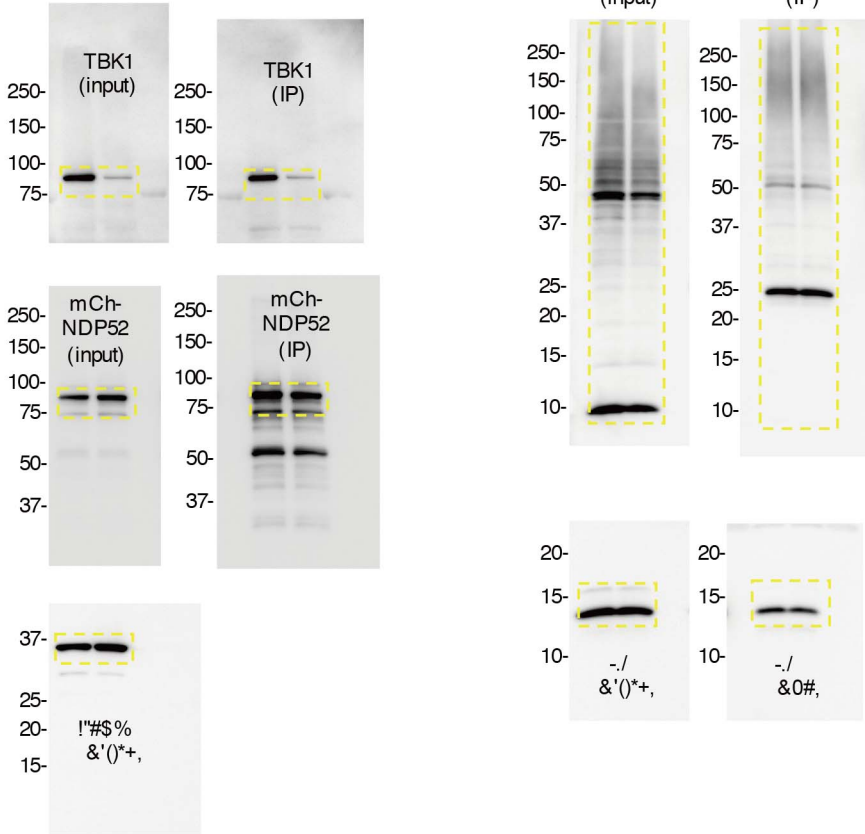

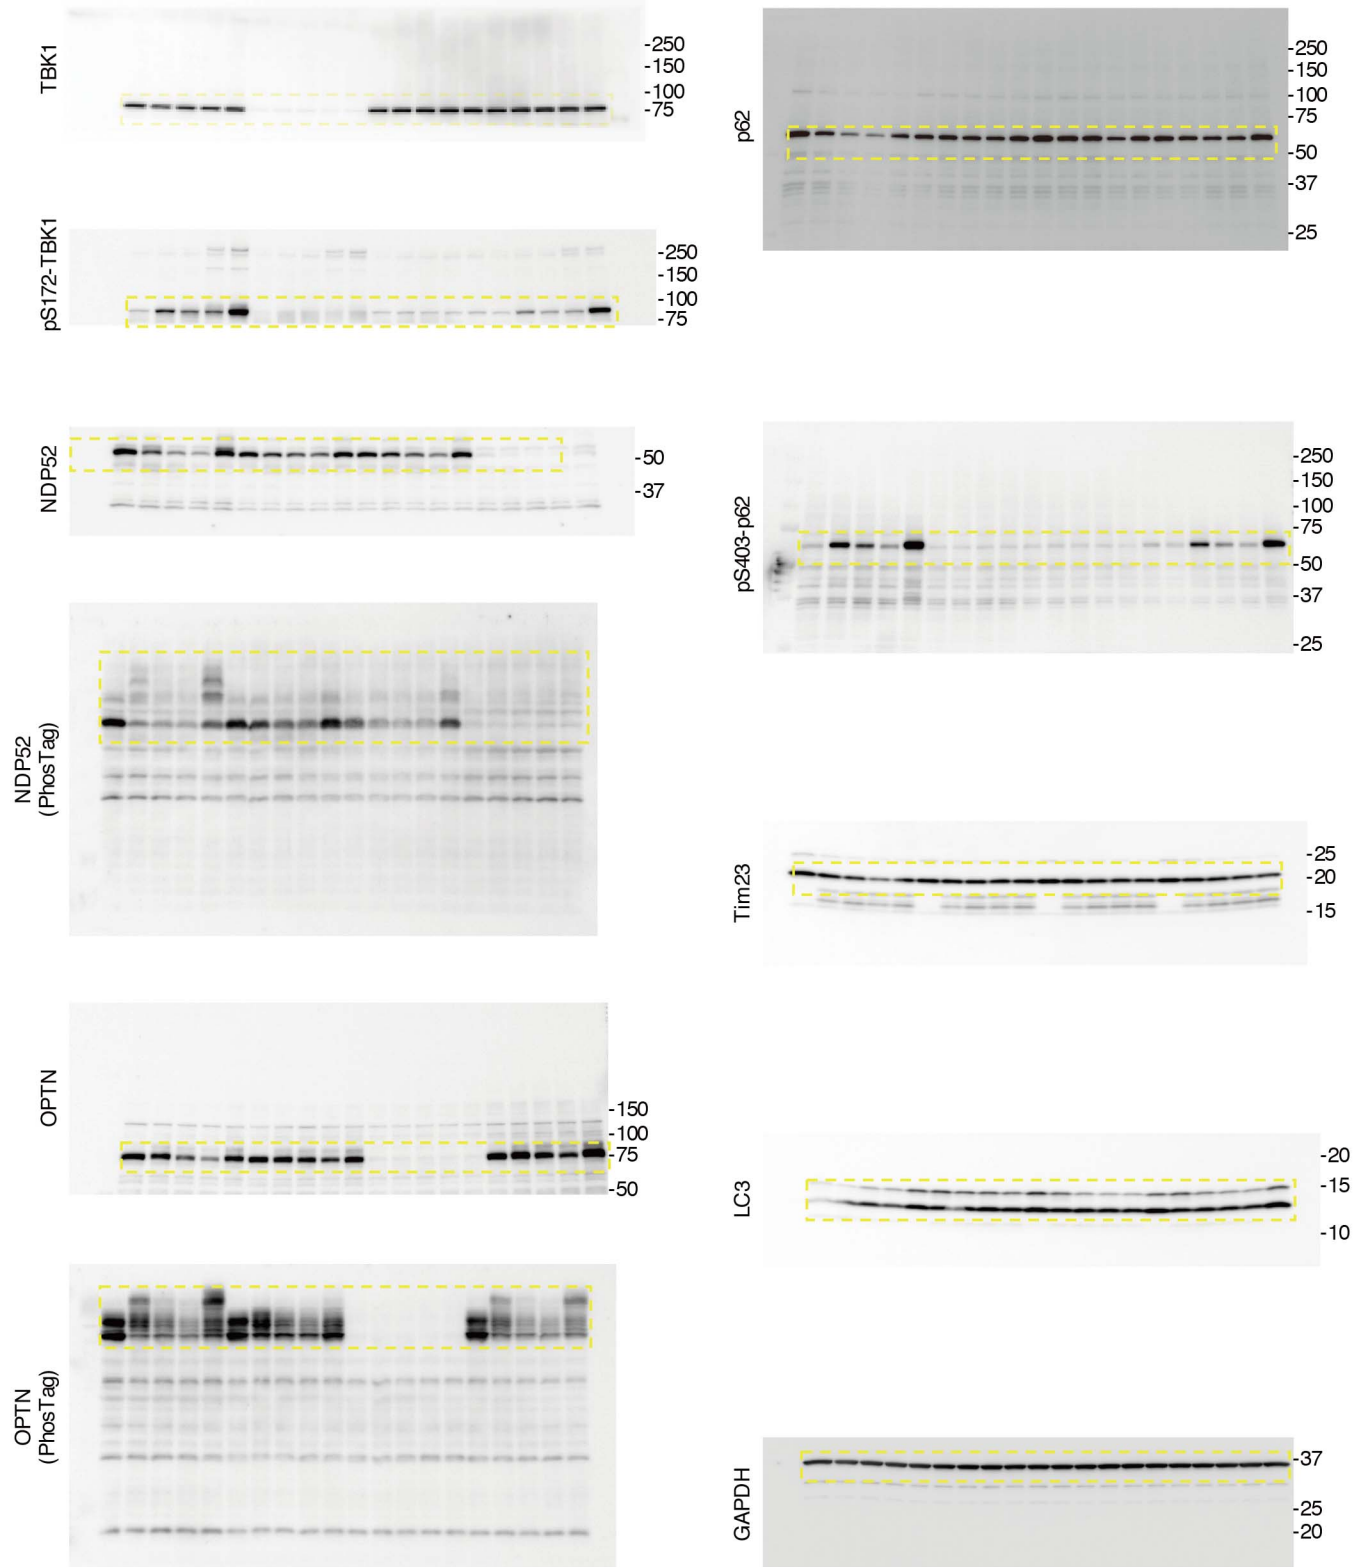

Source data of Fig. 3B

Supplement: EMBR-19-e46363-s014.pdf [file EMBR-19-e46363-s014.pdf]

Fig. 4C

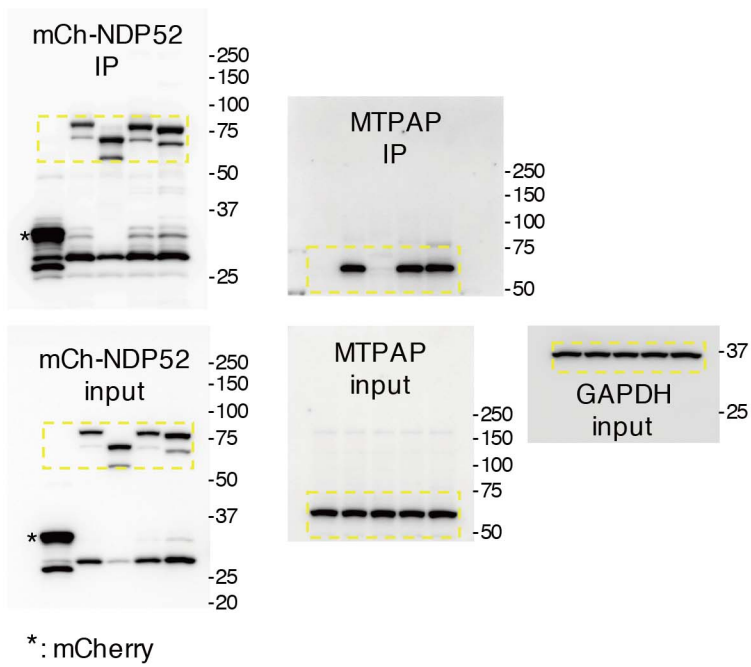

Fig. 4D

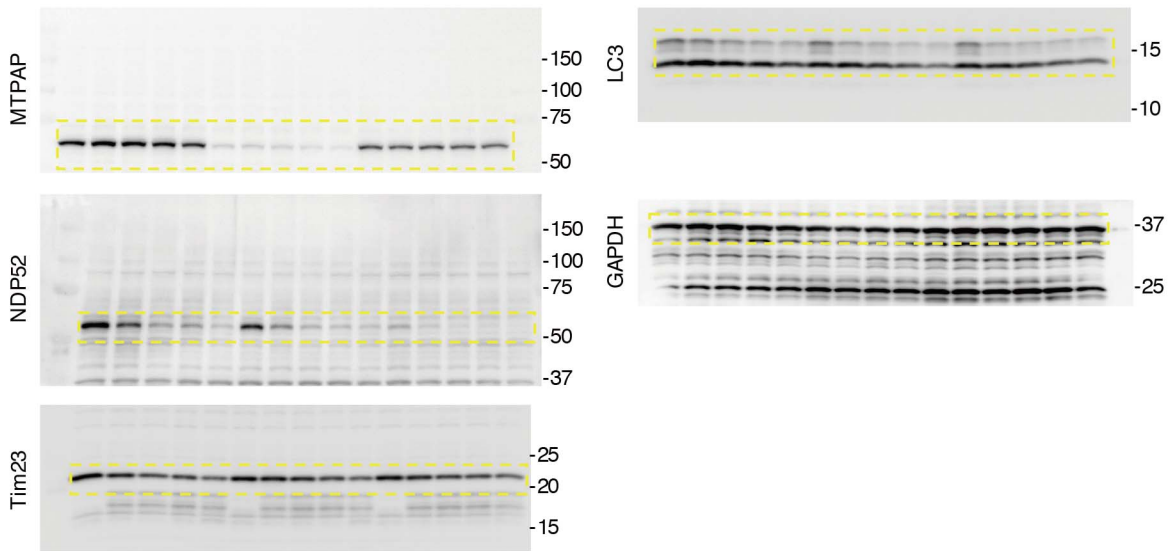

Fig. 4E

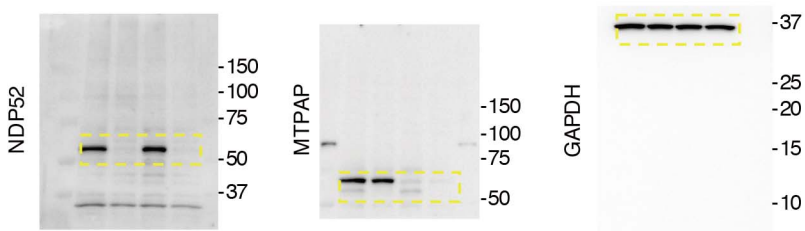

Supplement: EMBR-19-e46363-s015.pdf [file EMBR-19-e46363-s015.pdf]

Fig. 5B

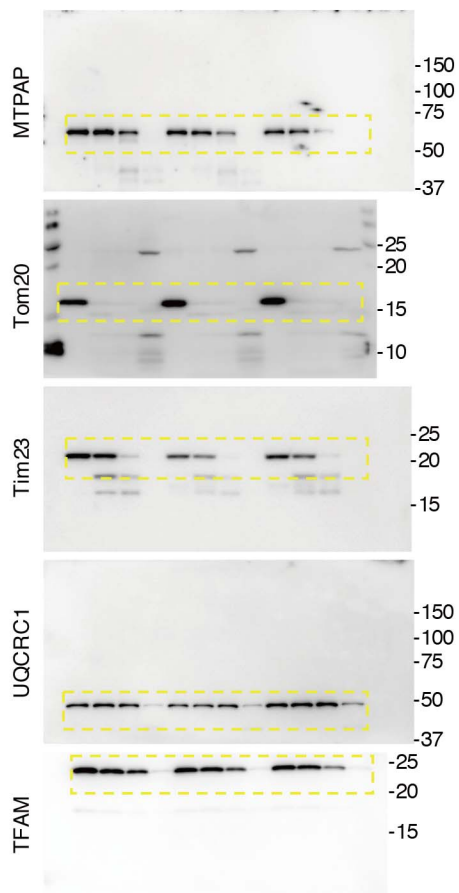

Fig. 5C

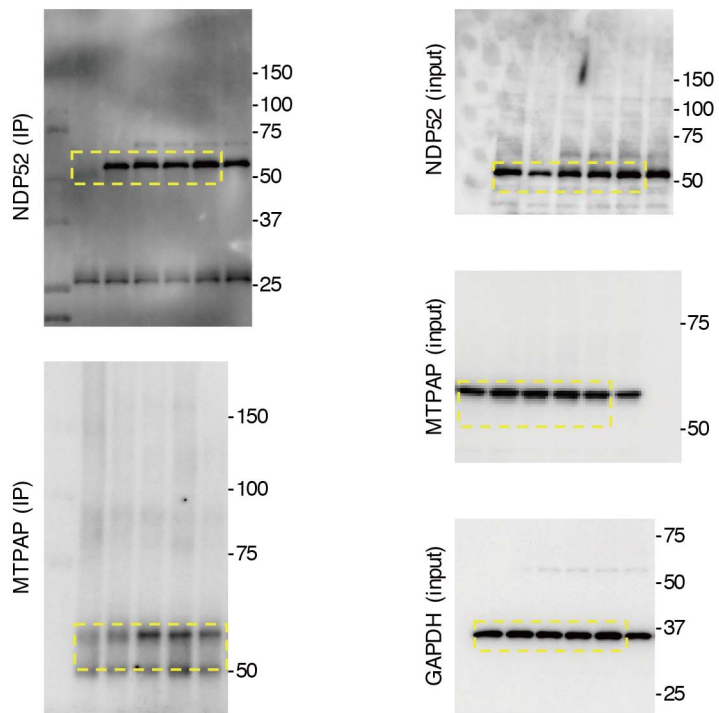

Fig. 5E

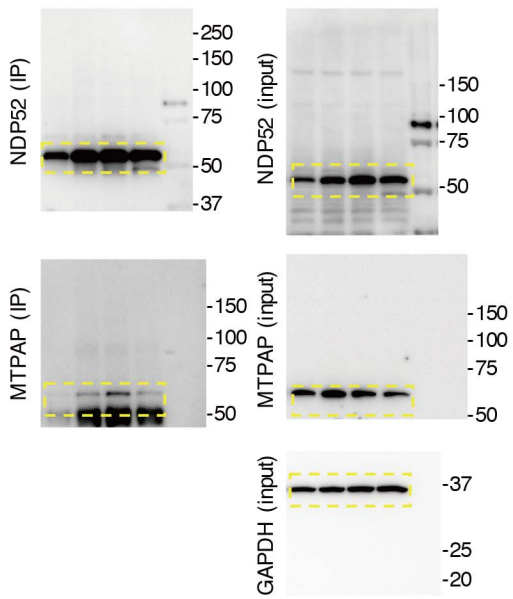

Fig. 5F

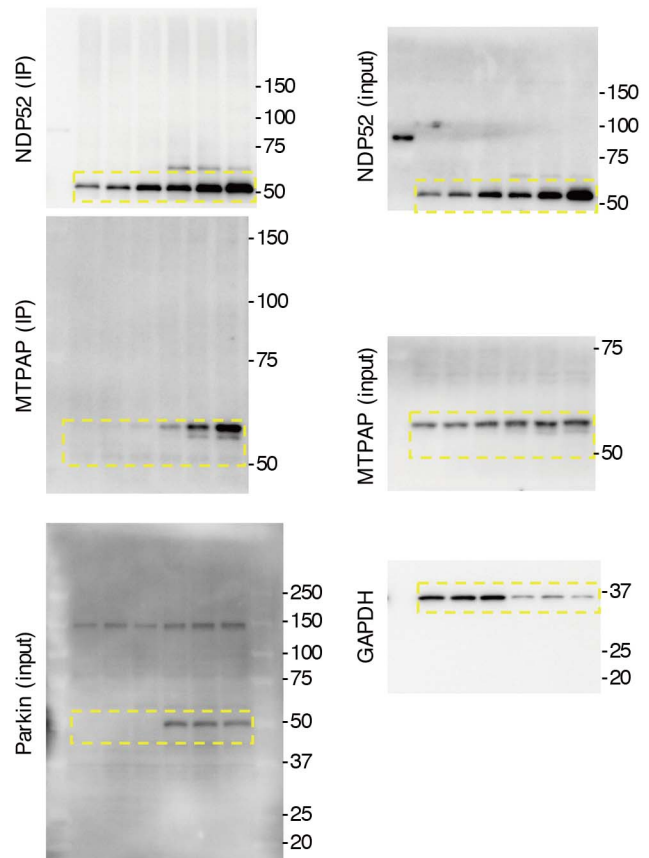

Supplement: EMBR-19-e46363-s016.pdf [file EMBR-19-e46363-s016.pdf]

Fig. 6C

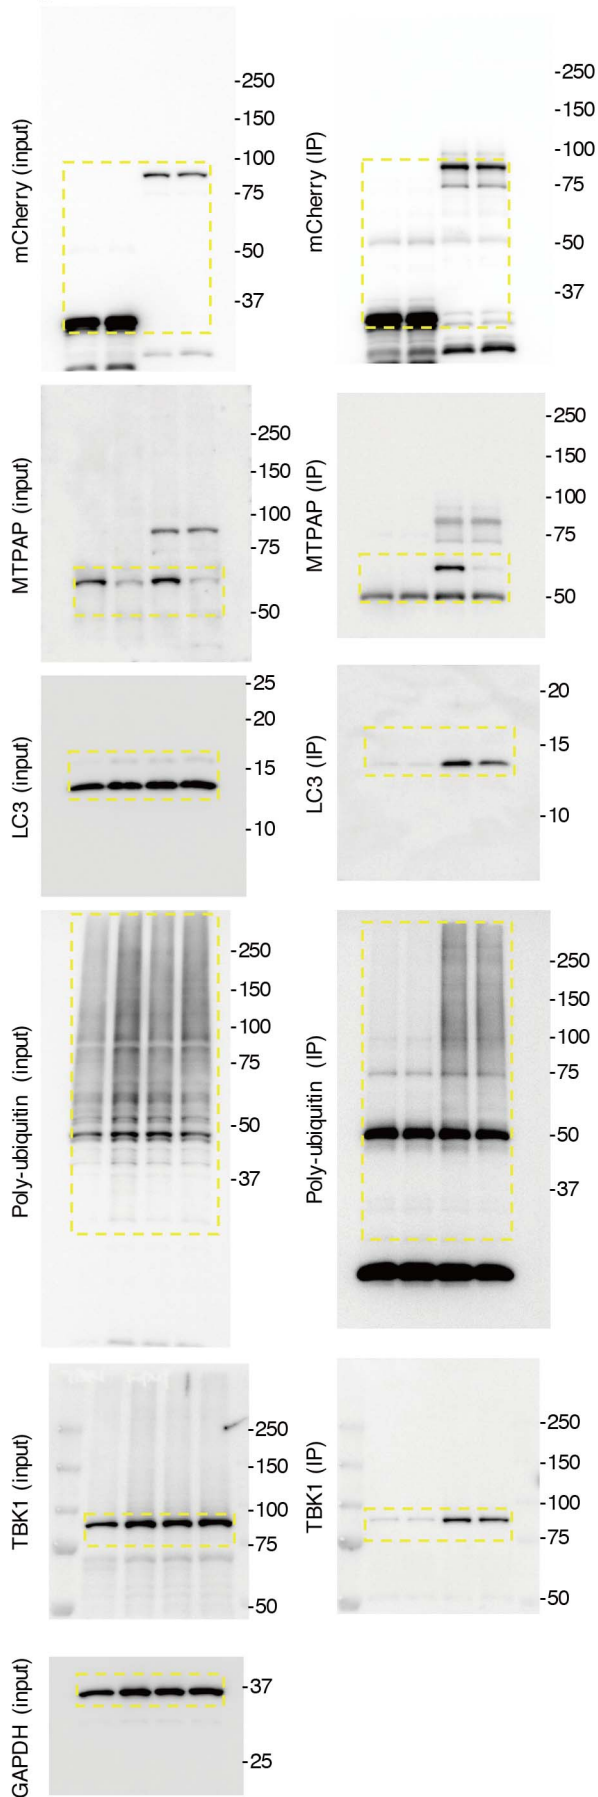

Fig. 6D

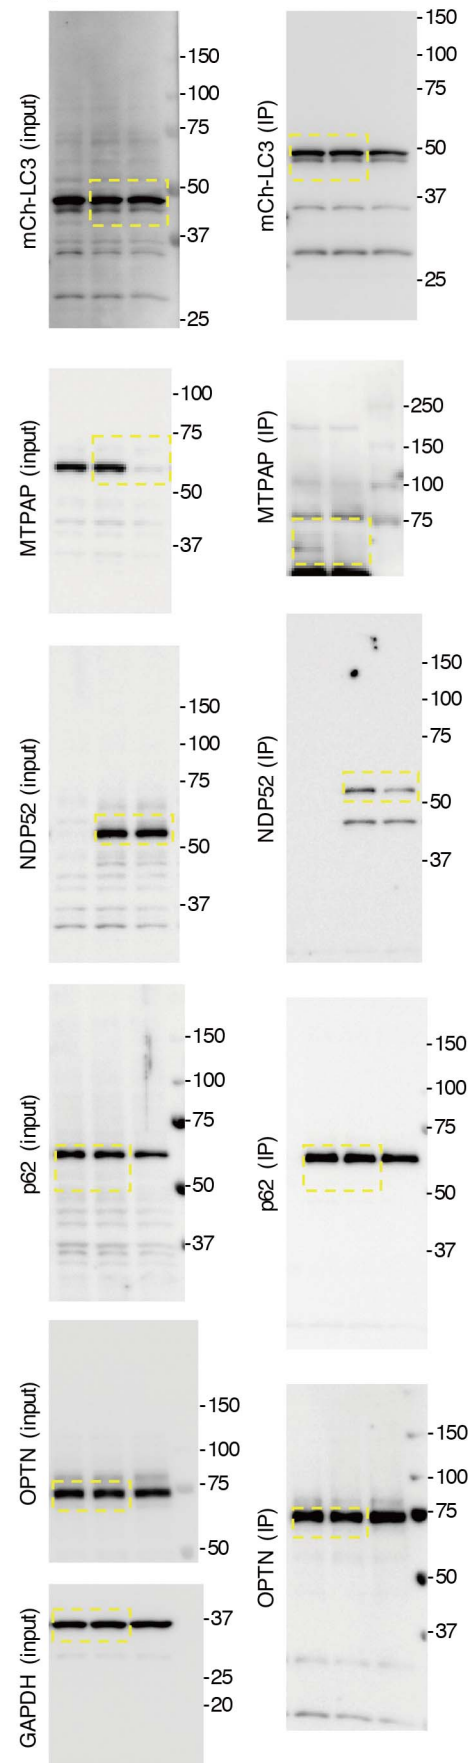

Fig. 6E

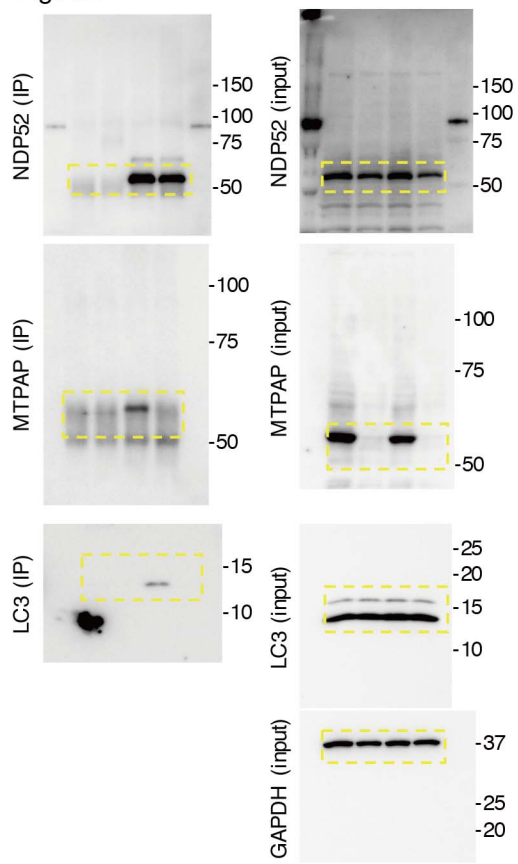

Fig. 6F

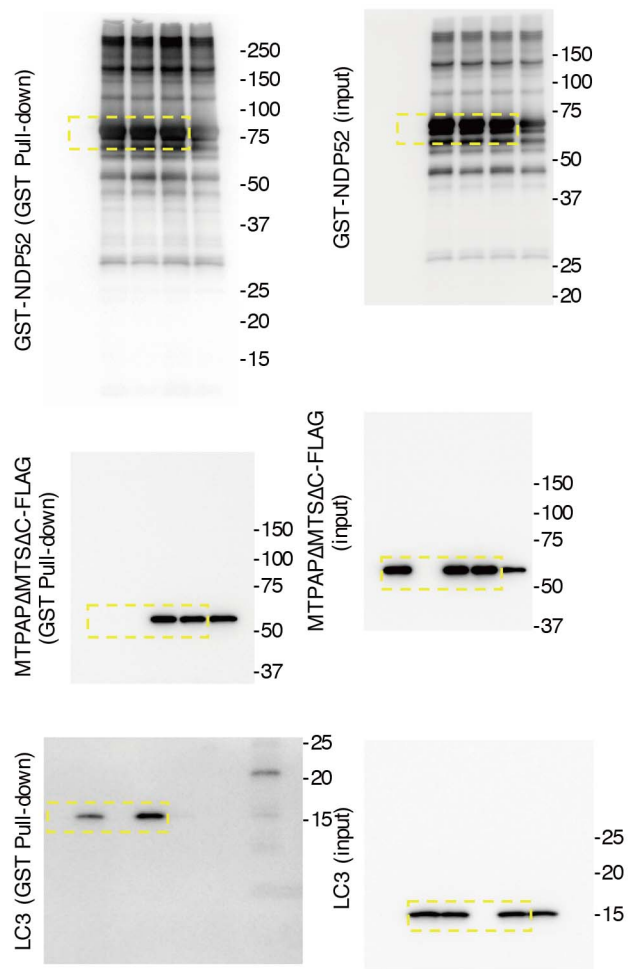

Supplement: EMBR-19-e46363-s017.pdf [file EMBR-19-e46363-s017.pdf]

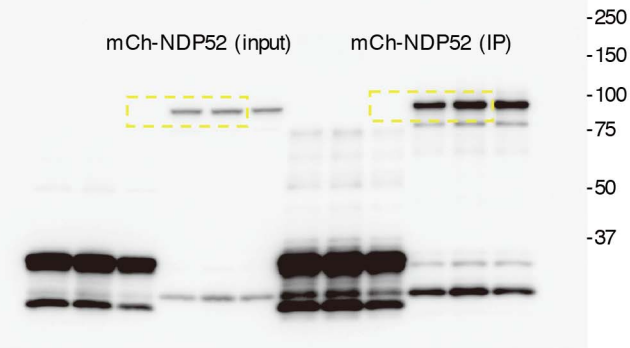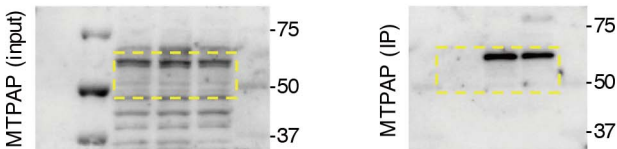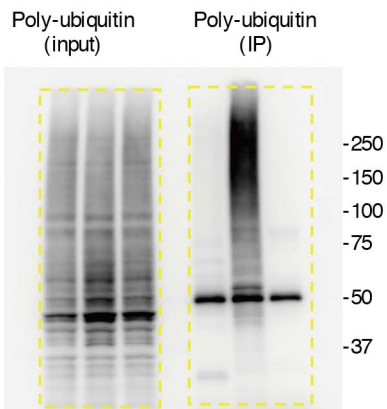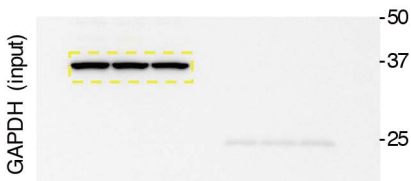

Supplement: EMBR-19-e46363-s018.pdf [file EMBR-19-e46363-s018.pdf]
